# Supplementary material for: Binding of Ca2+ Ions to Alkylbenzene Sulfonates: Micelle Formation, Second Critical Concentration and Precipitation
Source: MDPI journal article supplement (doi:10.3390/ma16020494), 2023-01-04
Supplement: s1 [file s1]

## SUPPORTING INFORMATION TO

### **Binding of Ca<sup>2+</sup> Ions to Alkylbenzene Sulfonates: Micelle Formation, Second Critical Concentration and Precipitation**

Adél Anna Ádám<sup>1</sup>, Szilveszter Ziegenheim<sup>1</sup>, László Janovák<sup>2</sup>, Márton Szabados<sup>1</sup>, Csaba Bús<sup>1</sup>,  
Ákos Kukovecz<sup>3</sup>, Zoltán Kónya<sup>3</sup>, Imre Dékány<sup>2</sup>, Pál Sipos<sup>4,\*</sup>, Bence Kutus<sup>4,\*</sup>

<sup>1</sup> Department of Organic Chemistry, University of Szeged, Dóm tér 8, 6720 Szeged, Hungary

<sup>2</sup> Department of Physical Chemistry and Materials Science, University of Szeged, Rerrich Béla tér 1, 6720 Szeged, Hungary

<sup>3</sup> Department of Applied and Environmental Chemistry, University of Szeged, Rerrich Béla tér 1, 6720 Szeged, Hungary

<sup>4</sup> Department of Inorganic and Analytical Chemistry, University of Szeged, Dóm tér 7, 6720 Szeged, Hungary

Correspondence: Prof. Dr. Pál Sipos, [sipos@chem.u-szeged.hu](mailto:sipos@chem.u-szeged.hu)

Dr. Bence Kutus, [kutusb@chem.u-szeged.hu](mailto:kutusb@chem.u-szeged.hu)

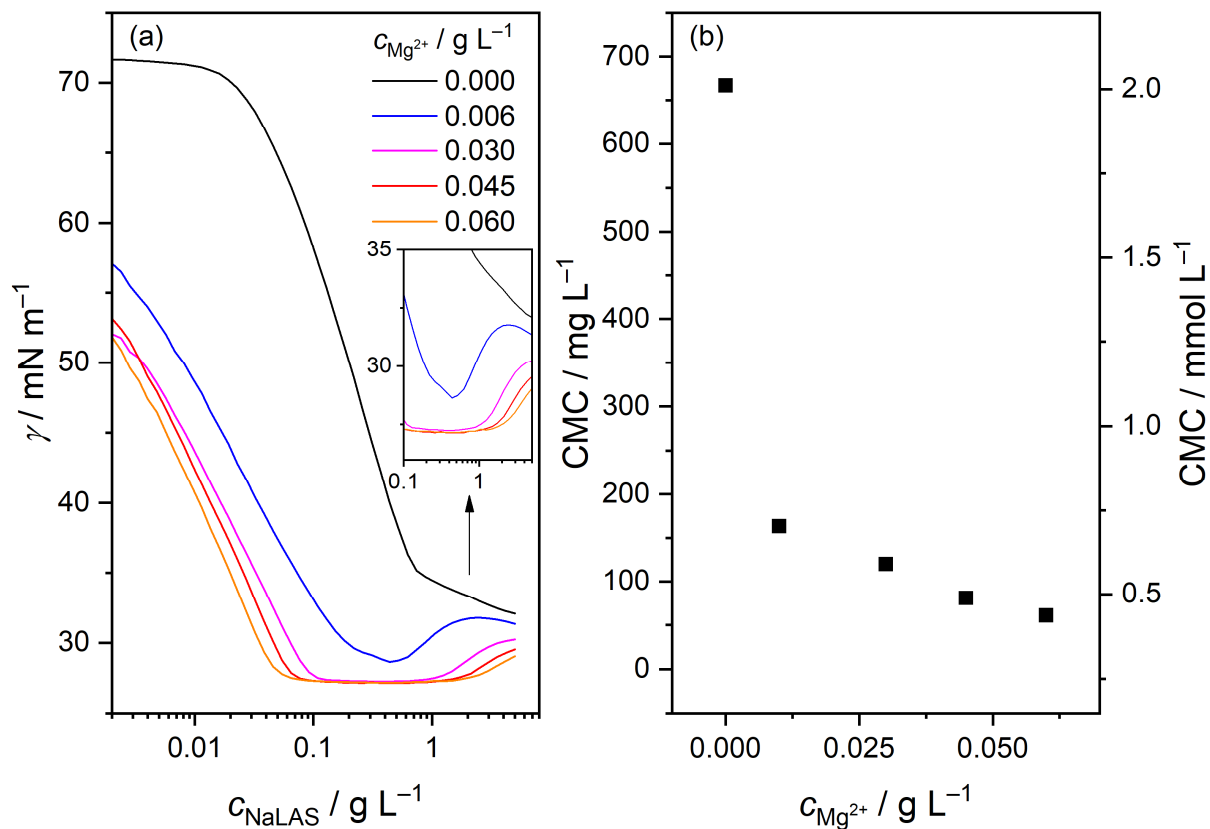

**Figure S1** (a) Surface tension ( $\gamma$ ) as a function of sodium linear alkylbenzene sulfonate (NaLAS) concentration, in the presence of  $\text{MgCl}_2$ . Inset: zoomed region showing the onset of the increase in  $\gamma$ ; (b) Critical micelle concentration (CMC) in  $\text{mg L}^{-1}$  (left axis) and in  $\text{mmol L}^{-1}$  (right axis), as a function of  $\text{Mg}^{2+}$ -ion concentration. Experimental conditions:  $c_{\text{Mg}^{2+}} = 0\text{--}0.0 \text{ g L}^{-1}$ ,  $c_{\text{NaLAS}} = 0.002\text{--}5.00 \text{ g L}^{-1}$ ,  $T = (25.0 \pm 0.1)^\circ\text{C}$ .

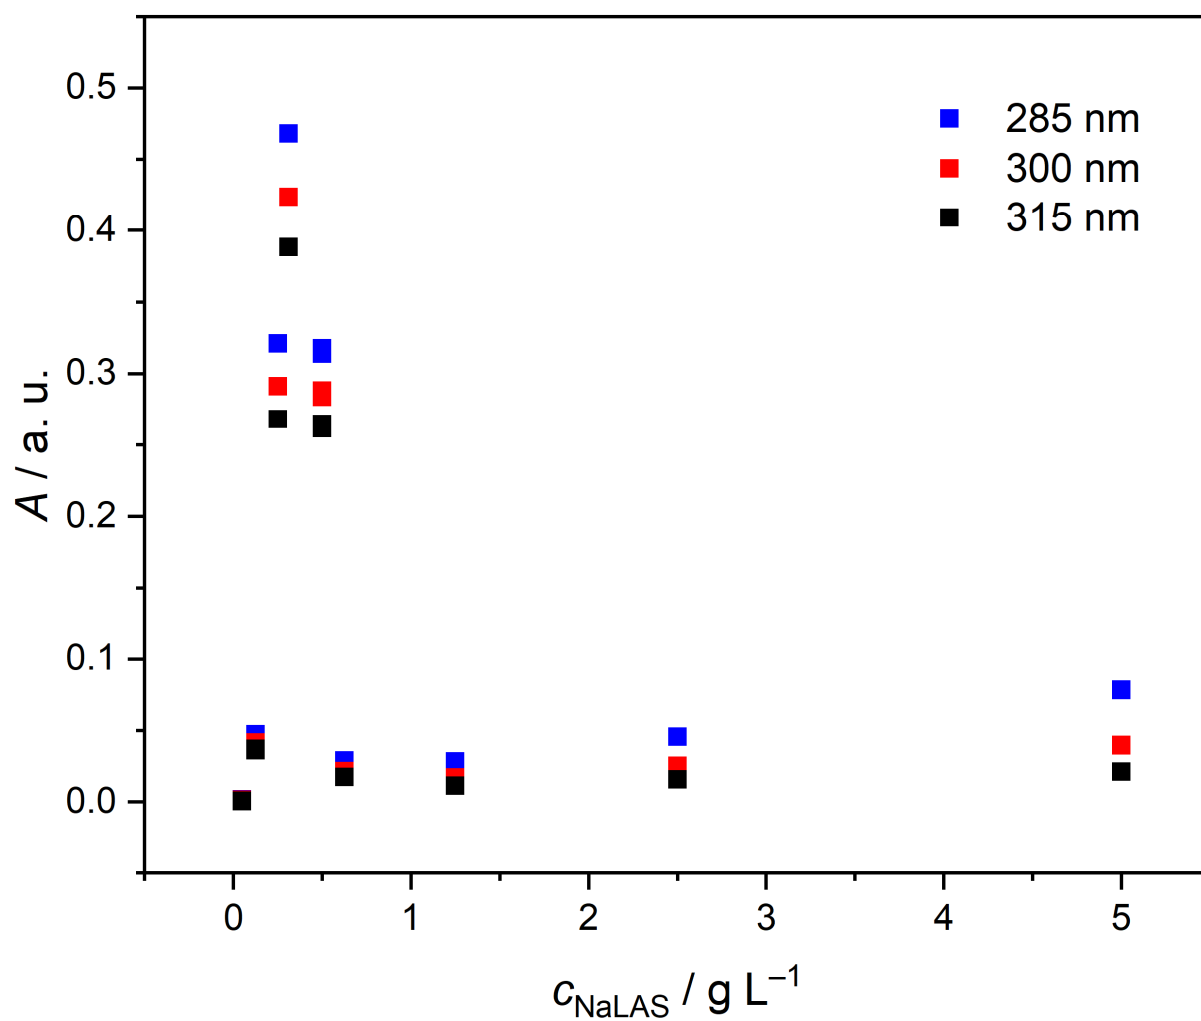

**Figure S2** Apparent absorbance ( $A$ ) at three different wavelengths as a function of sodium linear alkylbenzene sulfonate (NaLAS) concentration, in the presence of  $\text{CaCl}_2$ . Here, the absorbance measured arise from both light absorption and scattering; values close to zero indicate a transparent sample. Experimental conditions:  $c_{\text{Ca}^{2+}} = 0\text{--}0.1 \text{ g L}^{-1}$ ,  $c_{\text{NaLAS}} = 0.001\text{--}5.00 \text{ g L}^{-1}$ ,  $T = (25 \pm 0.1) ^\circ\text{C}$ .

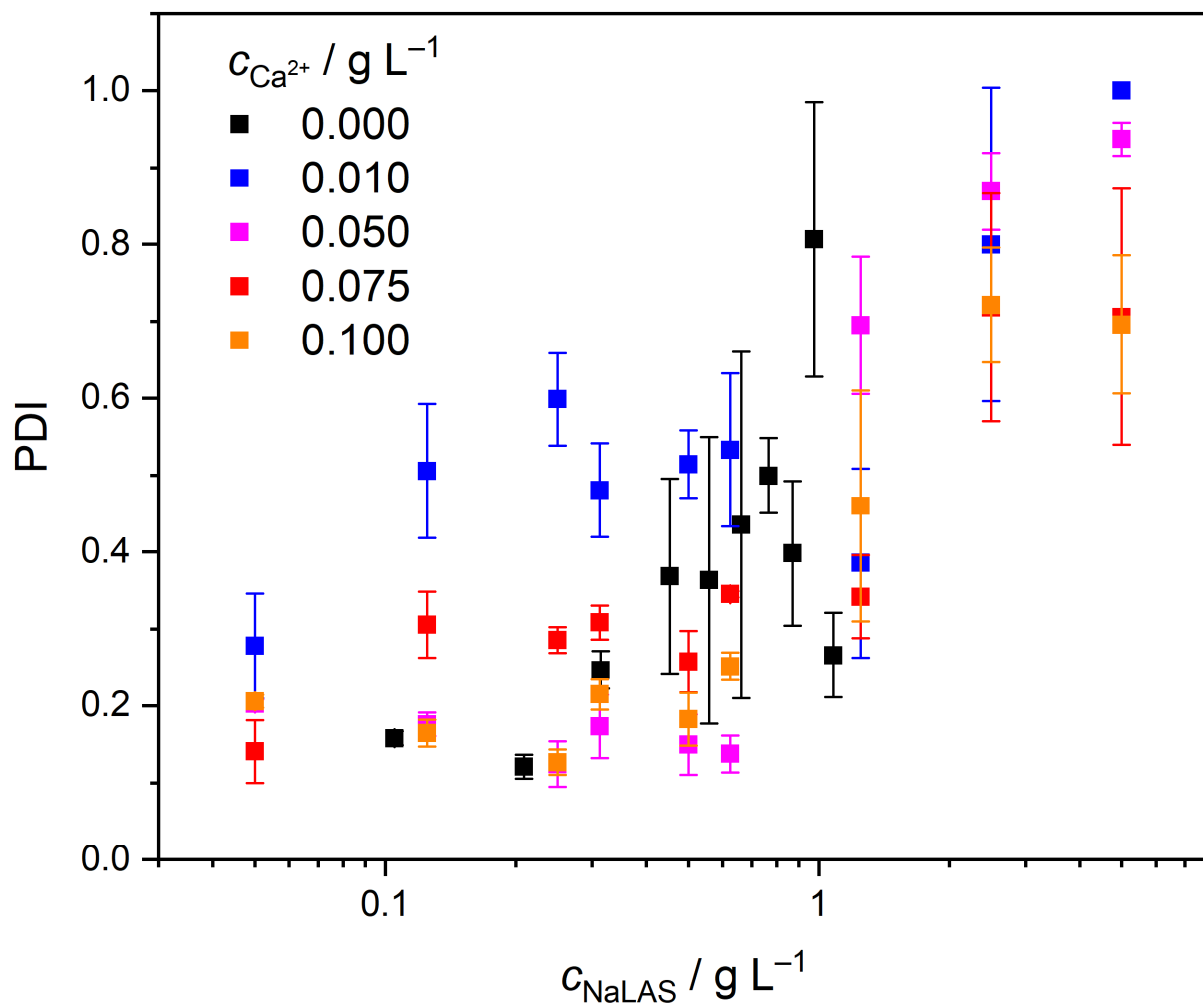

**Figure S3** Polydispersity index (PDI) as a function of sodium linear alkylbenzene sulfonate (NaLAS) concentration, in the presence of  $\text{CaCl}_2$ . Here, the error bars represent the standard deviation of at least three values obtained for each sample. Experimental conditions:

$$c_{\text{Ca}^{2+}} = 0\text{--}0.1 \text{ g L}^{-1}, c_{\text{NaLAS}} = 0.001\text{--}5.00 \text{ g L}^{-1}, T = (25 \pm 0.1) ^\circ\text{C}.$$

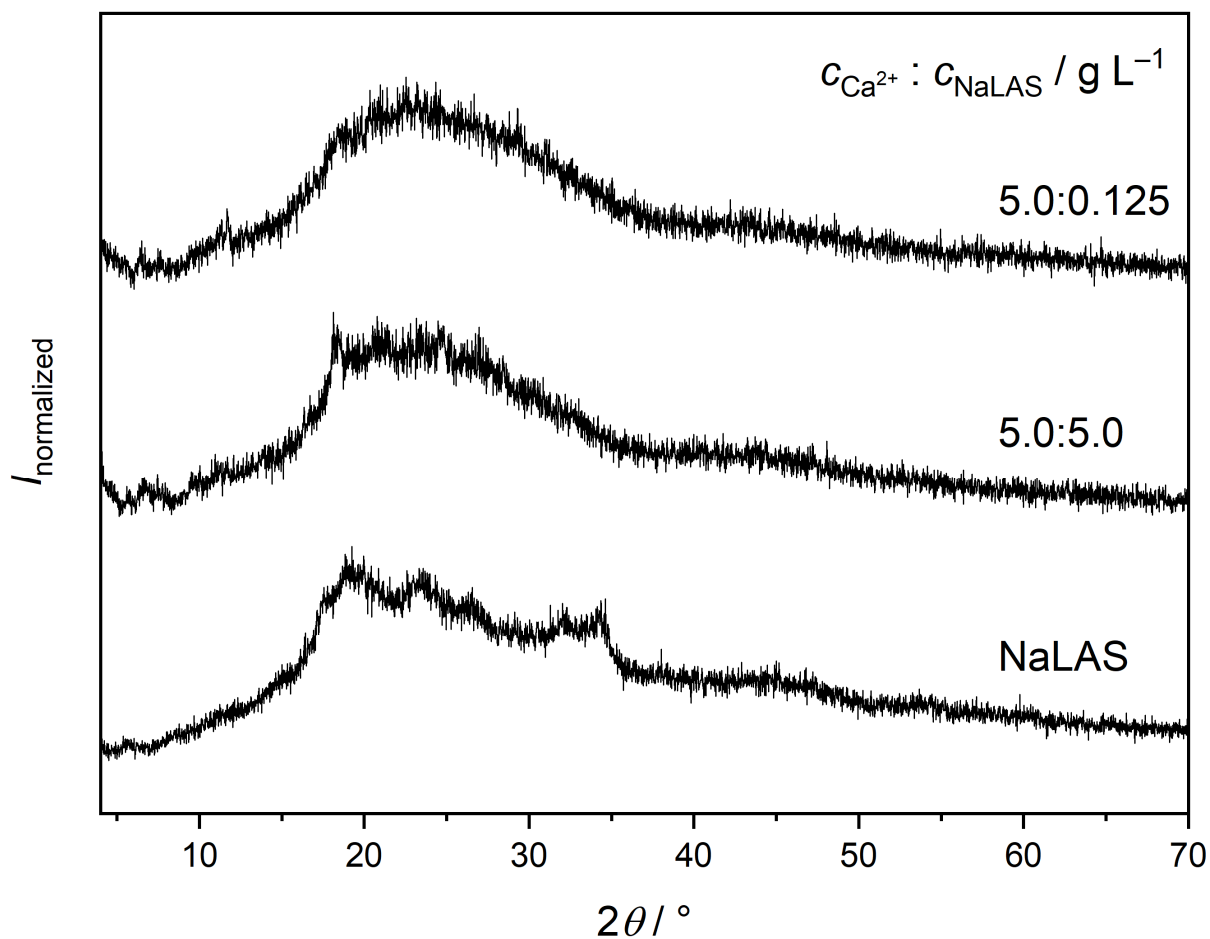

**Figure S4** Powder X-ray diffractograms of sodium linear alkylbenzene sulfonate (NaLAS) and precipitates formed by adding  $\text{CaCl}_2$  to surfactant solutions, at two different  $\text{Ca}^{2+}:\text{NaLAS}$  weight ratios. The intensities were normalized such that the highest value in each diffractogram is 1.00.

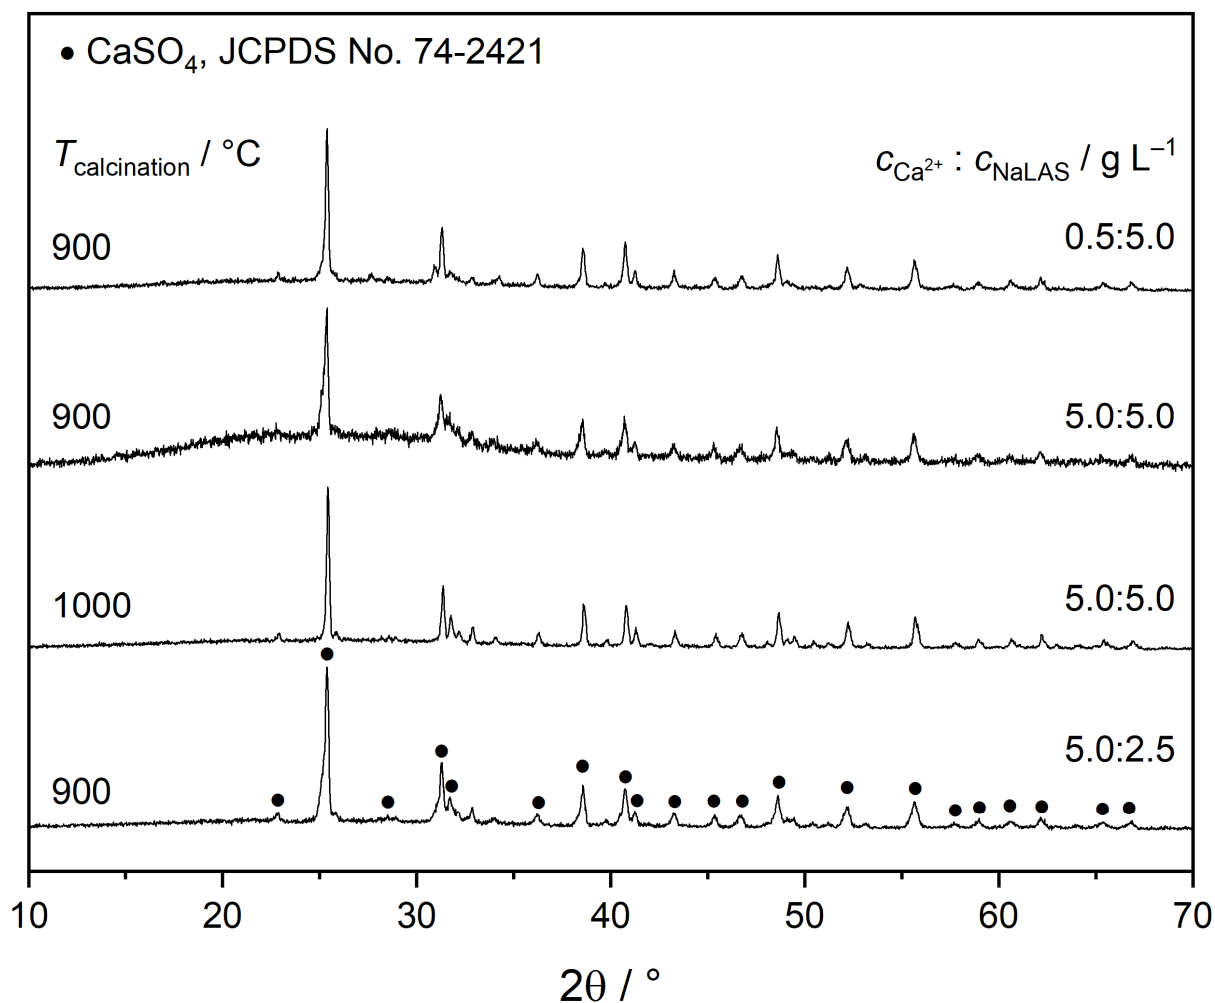

**Figure S5** Powder X-ray diffractograms of calcium linear alkylbenzene sulfonate (CaLAS<sub>2</sub>) precipitates, calcined at 900 °C (24 hours) or 1000 °C (16 hours). The starting solids formed in the mixtures of NaLAS and CaCl<sub>2</sub> at two different Ca<sup>2+</sup>:NaLAS weight ratios. The intensities were normalized such that the highest value in each diffractogram is 1.00.

**Table S1** Concentration of sodium linear alkylbenzene sulfonate (NaLAS) and Ca<sup>2+</sup> in surfactant – CaCl<sub>2</sub> dispersions, the atomic percentages of Na<sup>+</sup> and Ca<sup>2+</sup>, as well as the Na<sup>+</sup>:Ca<sup>2+</sup> molar ratios (with standard deviation) in the CaLAS<sub>2</sub> precipitates forming in the dispersions.

| $c_{\text{NaLAS}} / \text{g L}^{-1}$ | $c_{\text{Ca}^{2+}} / \text{g L}^{-1}$ | atom%Na <sup>+</sup> | atom%Ca <sup>2+</sup> | $n_{\text{Na}^+} / n_{\text{Ca}^{2+}}$ |
|--------------------------------------|----------------------------------------|----------------------|-----------------------|----------------------------------------|
| 2.50                                 | 5.00                                   | 0.5 ± 0.5            | 34.9 ± 2.1            | 0.01 ± 0.01                            |
| 5.00                                 | 0.50                                   | 3.9 ± 1.8            | 34.6 ± 2.3            | 0.1 ± 0.1                              |
| 5.00                                 | 1.00                                   | 0.4 ± 0.4            | 34.9 ± 4.9            | 0.01 ± 0.01                            |
| 5.00                                 | 2.00                                   | 1.8 ± 0.8            | 37.8 ± 3.0            | 0.05 ± 0.02                            |
| 5.00                                 | 3.00                                   | 1.4 ± 0.7            | 34.7 ± 1.5            | 0.04 ± 0.02                            |
| 5.00                                 | 4.00                                   | 0.8 ± 0.6            | 36.8 ± 0.8            | 0.02 ± 0.02                            |
